# Supplementary material for: Mechanistic insights into the digestion of complex dietary fibre by the rumen microbiota using combinatorial high-resolution glycomics and transcriptomic analyses
Source: PubMed Central journal article supplement — Comput Struct Biotechnol J. 2021 Dec 9;20:148–64. doi: 10.1016/j.csbj.2021.12.009 (PMC8702857; doi:10.1016/j.csbj.2021.12.009), 2021-12-09

|                                       | <b>Statistic</b> |
|---------------------------------------|------------------|
| <b>Nb. Transcripts</b>                | 1,998,343        |
| <b>Nb. Components</b>                 | 1,519,417        |
| <b>Total Transcripts Length (bp)</b>  | 985,052,557      |
| <b>Min. Transcript Length (bp)</b>    | 224              |
| <b>1st Qu. Transcript Length (bp)</b> | 265              |
| <b>Median Transcript Length (bp)</b>  | 336              |
| <b>Mean Transcript Length (bp)</b>    | 493              |
| <b>3rd Qu. Transcript Length (bp)</b> | 508              |
| <b>Max. Transcript Length (bp)</b>    | 49,844           |
| <b>Nb. Duplicate Transcripts</b>      | 1                |
| <b>N10 (bp)</b>                       | 2,289            |
| <b>N20 (bp)</b>                       | 1,354            |
| <b>N30 (bp)</b>                       | 932              |
| <b>N40 (bp)</b>                       | 687              |
| <b>N50 (bp)</b>                       | 533              |
| <b>N60 (bp)</b>                       | 427              |
| <b>N70 (bp)</b>                       | 352              |
| <b>N80 (bp)</b>                       | 298              |
| <b>N90 (bp)</b>                       | 256              |
| <b>Min. Transcript N %</b>            | 0                |
| <b>1st Qu. Transcript N %</b>         | 0                |
| <b>Median Transcript N %</b>          | 0                |
| <b>Mean Transcript N %</b>            | 0                |
| <b>3rd Qu. Transcript N %</b>         | 0                |
| <b>Max. Transcript N %</b>            | 0                |
| <b>Total A %</b>                      | 26               |
| <b>Total C %</b>                      | 25               |
| <b>Total G %</b>                      | 26               |
| <b>Total T %</b>                      | 22               |
| <b>Total M %</b>                      | 0                |
| <b>Total R %</b>                      | 0                |
| <b>Total W %</b>                      | 0                |
| <b>Total S %</b>                      | 0                |
| <b>Total Y %</b>                      | 0                |
| <b>Total K %</b>                      | 0                |
| <b>Total V %</b>                      | 0                |
| <b>Total H %</b>                      | 0                |
| <b>Total D %</b>                      | 0                |
| <b>Total B %</b>                      | 0                |
| <b>Total N %</b>                      | 0                |
| <b>Total - %</b>                      | 0                |
| <b>Total + %</b>                      | 0                |
| <b>Total . %</b>                      | 0                |

# Contig Length Distribution

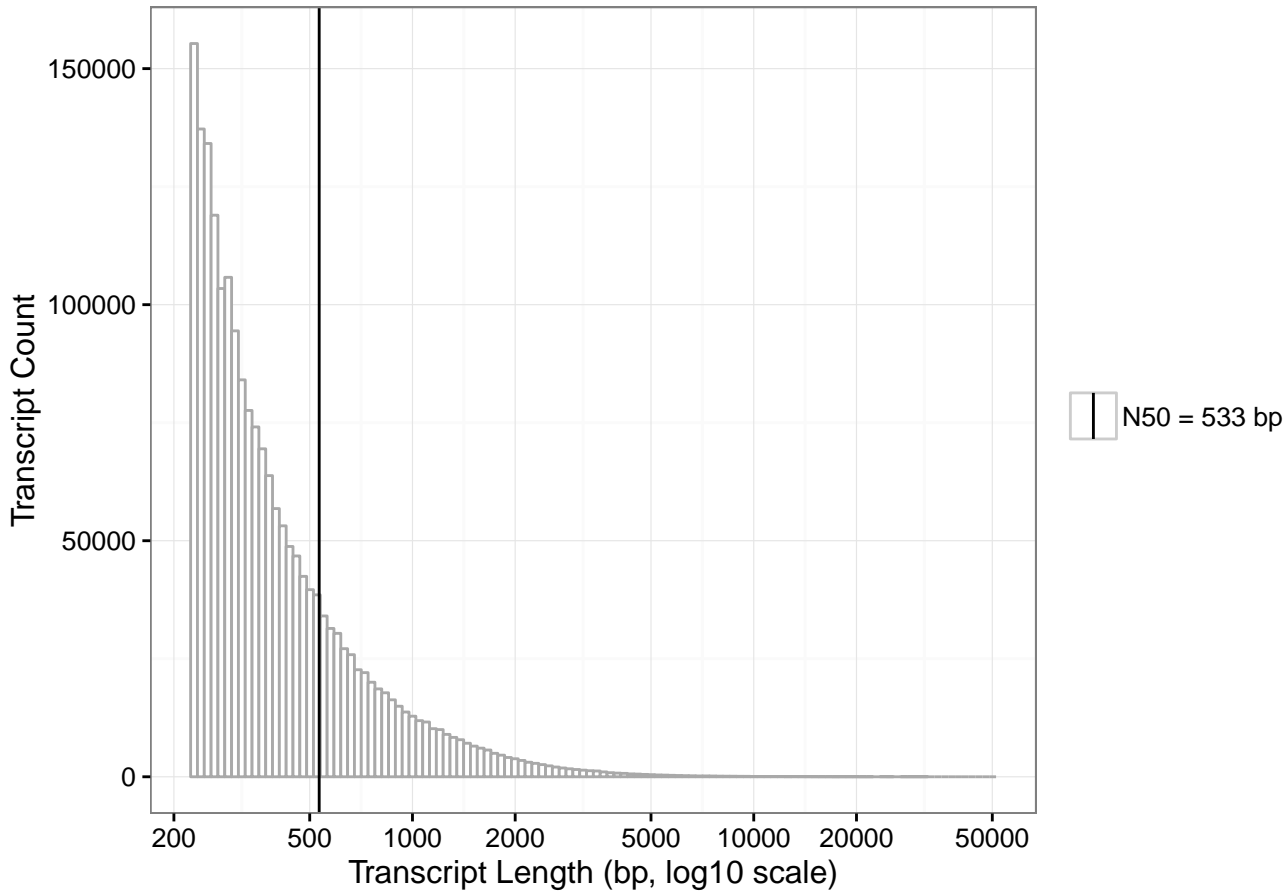

Supplement: mmc2.pdf [file mmc2.pdf]
