# Supplementary material for: Mechanistic insights into the digestion of complex dietary fibre by the rumen microbiota using combinatorial high-resolution glycomics and transcriptomic analyses
Source: PubMed Central journal article supplement — Comput Struct Biotechnol J. 2021 Dec 9;20:148–64. doi: 10.1016/j.csbj.2021.12.009 (PMC8702857; doi:10.1016/j.csbj.2021.12.009), 2021-12-09
Supplement: mmc9.pdf [file mmc9.pdf]

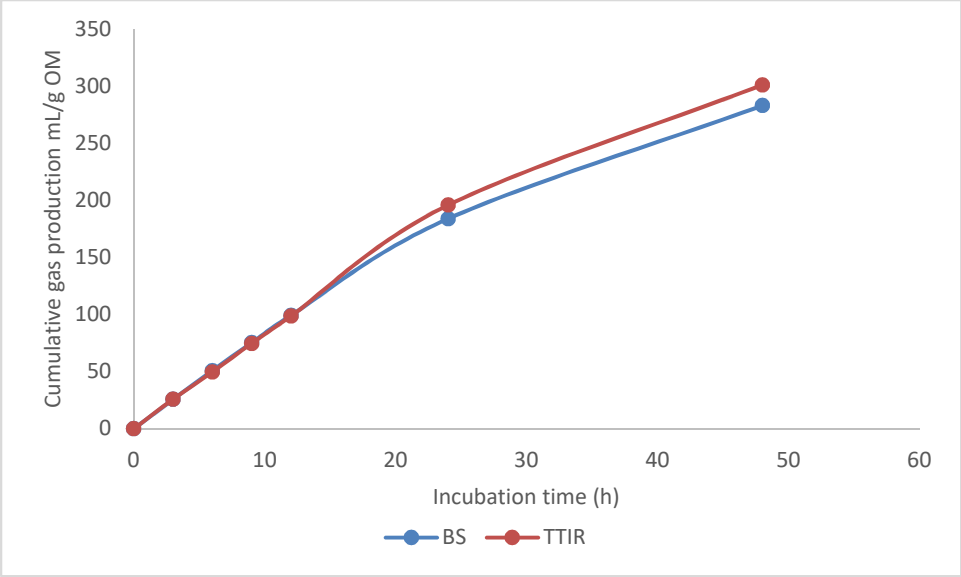

Cumulative gas production by rumen microbiota when incubated with BS and TTIR under *in vitro* batch culture.
