# Supplementary figures and images for: Mechanistic insights into the digestion of complex dietary fibre by the rumen microbiota using combinatorial high-resolution glycomics and transcriptomic analyses
Source: PubMed Central journal article supplement — Comput Struct Biotechnol J. 2021 Dec 9;20:148–64. doi: 10.1016/j.csbj.2021.12.009 (PMC8702857; doi:10.1016/j.csbj.2021.12.009), 2021-12-09

## GH5

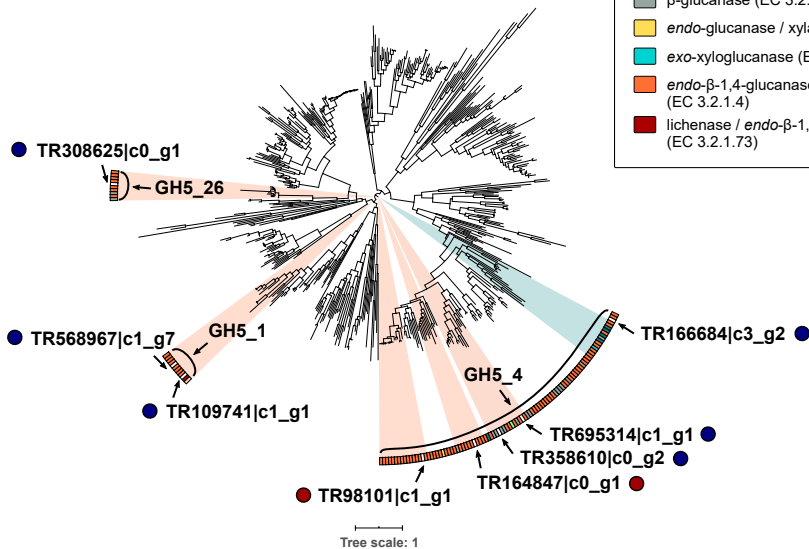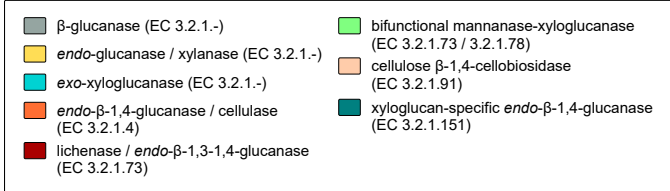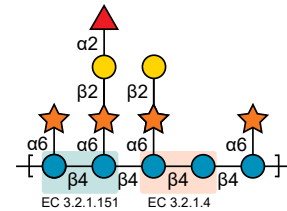

Xyloglucan

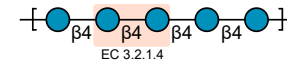

Cellulose

## GH16

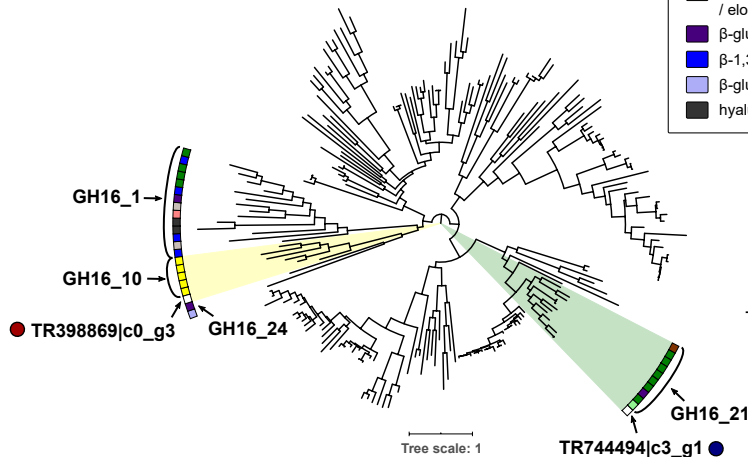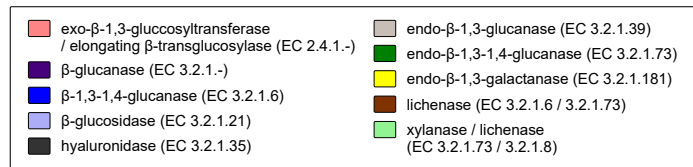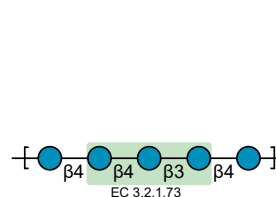

Mixed-linkage glucan

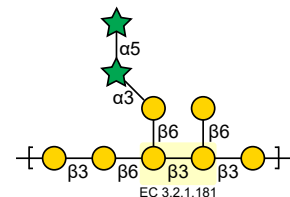

Type II arabinogalactan

Supplement: mmc10.pdf [file mmc10.pdf]

**A**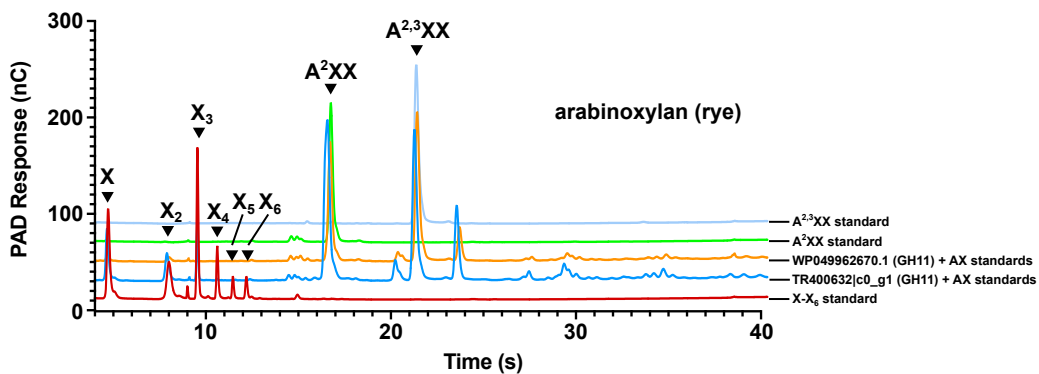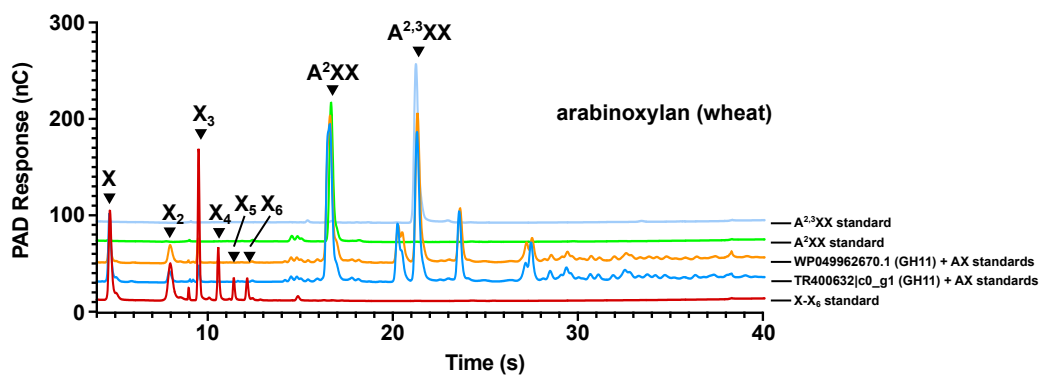**B**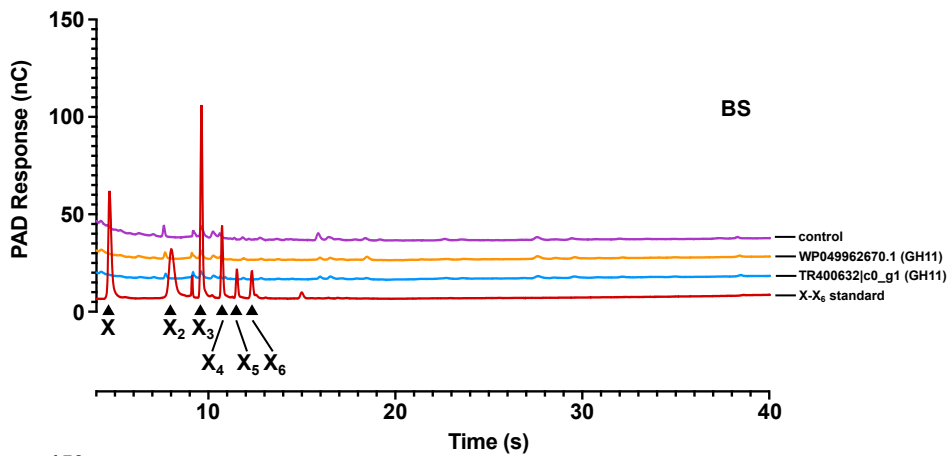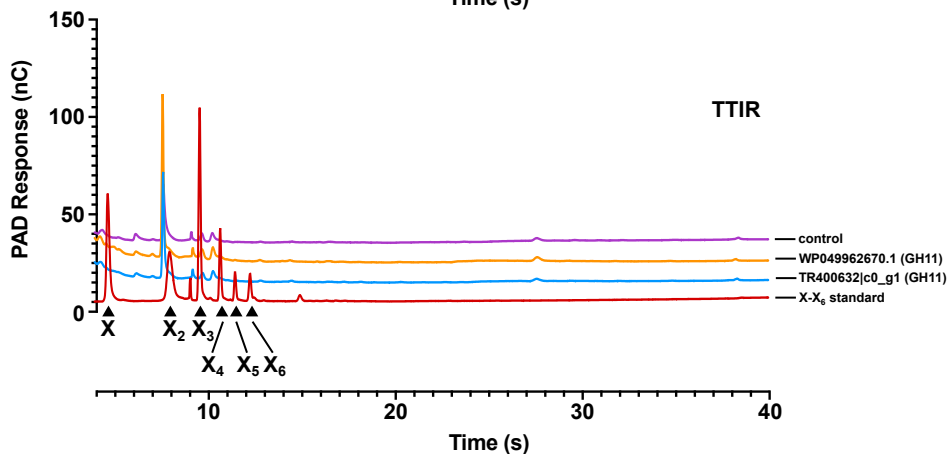

Supplement: mmc11.pdf [file mmc11.pdf]

## Cellulose

## Hemicellulose

## Pectin

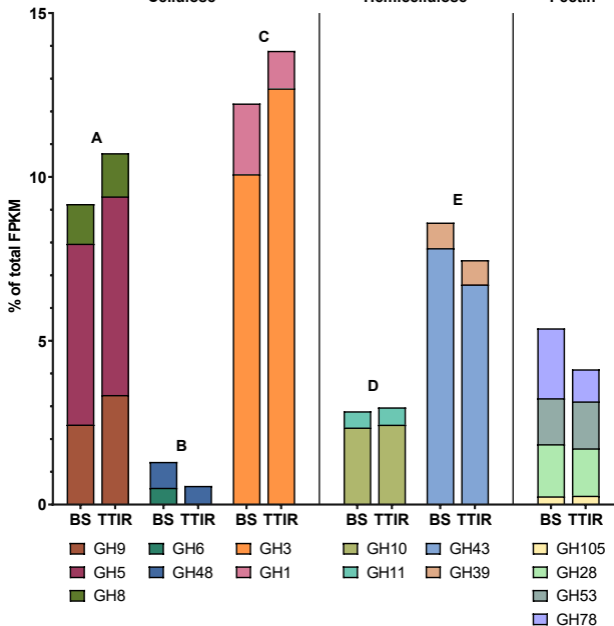

Supplement: mmc6.pdf [file mmc6.pdf]

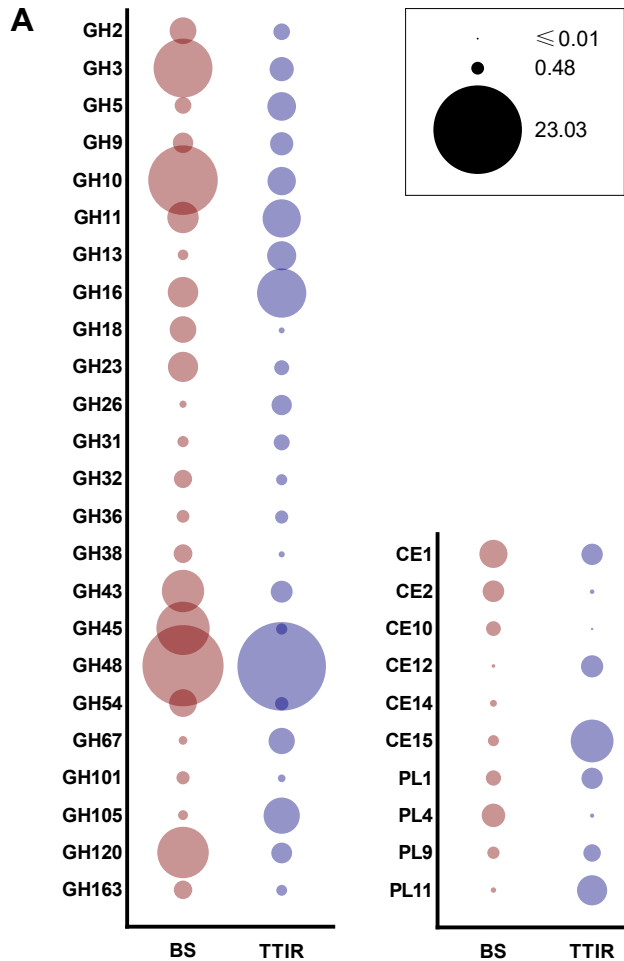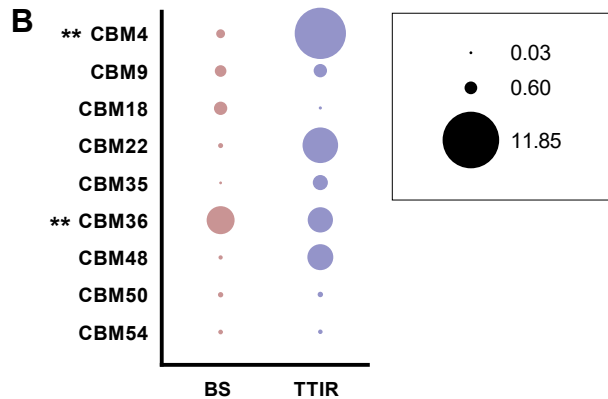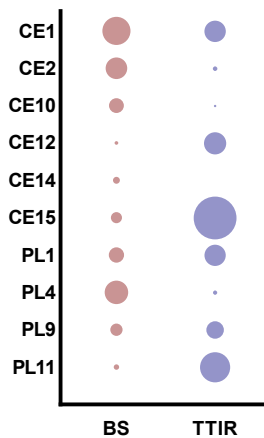

Supplement: mmc8.pdf [file mmc8.pdf]
